# Supplementary material
Source: Research Square preprint supplement (doi:10.21203/rs.3.rs-8874359/v1)
Supplement: Supplementary file 1 [file 6cbfad16de134c41a987e918.docx]

**Supplementary Information (SI)**

**Table S1.** Spearman correlation at the Coyoacán station for the Cupressaceae family

| **Cupressaceae** |  | **Max Temp** | **Mean Temp** | **Min Temp** | **Wind Speed** | **Relative Humidity** | **Radiation** | **Precipitation** |
| --- | --- | --- | --- | --- | --- | --- | --- | --- |
| **PPP**  **n= 3337** | rs | 0.0471 | 0.0193 | 0.0187 | -0.0348 | 0.0073 | -0.0160 | -0.0397 |
| *P<0.05 | 0.0066 | 0.2627 | 0.2806 | 0.0430 | 0.6733 | 0.3759 | 0.0219 |
| **Pre-pico**  **n= 1535** | rs | 0.0305 | 0.0267 | 0.0304 | -0.1394 | 0.0911 | -0.2274 | -0.2824 |
| *P<0.05 | 0.2325 | 0.2957 | 0.2340 | 0.0000 | 0.0004 | 0.0000 | 0.0000 |
| **Post pico**  **n= 1805** | rs | 0.0702 | 0.0202 | -0.0610 | 0.0480 | -0.1044 | 0.0902 | -0.2778 |
| *P<0.05 | 0.0029 | 0.3862 | 0.0095 | 0.0400 | 0.0000 | 0.0002 | 0.0000 |

**Table S2.** Spearman correlation at the Cuajimalpa station for the Cupressaceae family

| **Cupressaceae** |  | **Max Temp** | **Mean Temp** | **Min Temp** | **Wind Speed** | **Relative Humidity** | **Radiation** | **Precipitation** |
| --- | --- | --- | --- | --- | --- | --- | --- | --- |
| **PPP**  **n= 2462** | rs | -0.0037 | -0.0274 | -0.0168 | 0.0400 | -0.0971 | -0.0494 | -0.2306 |
| *P<0.05 | 0.8545 | 0.1697 | 0.4054 | 0.0474 | 0.0000 | 0.0138 | 0.0000 |
| **Pre-pico**  **n= 1256** | rs | -0.0850 | -0.0423 | 0.0565 | 0.0011 | 0.0401 | -0.1735 | -0.2732 |
| *P<0.05 | 0.0026 | 0.1277 | 0.0454 | 0.9677 | 0.1555 | 0.0000 | 0.0000 |
| **Post pico**  **n= 1194** | rs | 0.0879 | 0.0089 | -0.0410 | 0.1080 | -0.2089 | 0.0838 | -0.1841 |
| *P<0.05 | 0.0024 | 0.7583 | 0.1571 | 0.0002 | 0.0000 | 0.0038 | 0.0000 |

**Table S3.** Spearman correlation at the PNDL station for the Cupressaceae family

| **Cupressaceae** |  | **Max Temp** | **Mean Temp** | **Min Temp** | **Wind Speed** | **Relative Humidity** | **Radiation** | **Precipitation** |
| --- | --- | --- | --- | --- | --- | --- | --- | --- |
| **PPP**  **n= 945** | rs | -0.0792 | -0.1877 | -0.2052 | -0.2851 | -0.1516 | -0.0552 | -0.1909 |
| *P<0.05 | 0.0150 | 0.0000 | 0.0000 | 0.0000 | 0.0000 | 0.0901 | 0.0000 |
| **Pre-pico**  **n= 197** | rs | 0.2228 | 0.1858 | -0.1002 | 0.0566 | -0.2761 | 0.1417 | -0.3146 |
| *P<0.05 | 0.0018 | 0.0093 | 0.1607 | 0.4281 | 0.0001 | 0.0473 | 0.0000 |
| **Post pico**  **n= 1805** | rs | -0.1169 | -0.2487 | -0.2235 | -0.3682 | -0.1011 | -0.0607 | -0.2443 |
| *P<0.05 | 0.0015 | 0.0000 | 0.0000 | 0.0000 | 0.0060 | 0.0985 | 0.0000 |

**Table S4.** Spearman correlation at the Coyoacán station for the *Pinus* sp.

| **Pinus *sp.*** |  | **Max Temp** | **Mean Temp** | **Min Temp** | **Wind Speed** | **Relative Humidity** | **Radiation** | **Precipitation** |
| --- | --- | --- | --- | --- | --- | --- | --- | --- |
| **PPP**  **n= 3210** | rs | 0.0479 | 0.0813 | 0.1515 | -0.2227 | 0.2402 | -0.1087 | -0.0370 |
| *P<0.05 | 0.0067 | 0.0000 | 0.0000 | 0.0000 | 0.0000 | 0.0000 | 0.0360 |
| **Pre-pico**  **n= 2092** | rs | -0.0119 | 0.0192 | 0.1141 | -0.1459 | 0.2443 | -0.1129 | -0.0753 |
| *P<0.05 | 0.5872 | 0.3793 | 0.0000 | 0.0000 | 0.0000 | 0.0000 | 0.0006 |
| **Post pico**  **n= 1112** | rs | 0.1978 | 0.2179 | 0.1713 | -0.2562 | 0.0923 | -0.0820 | -0.2432 |
| *P<0.05 | 0.0000 | 0.0000 | 0.0000 | 0.0000 | 0.0021 | 0.0063 | 0.0000 |

**Table S5.** Spearman correlation at the Cuajimalpa station for the *Pinus* sp.

| **Pinus sp.** |  | **Max Temp** | **Mean Temp** | **Min Temp** | **Wind Speed** | **Relative Humidity** | **Radiation** | **Precipitation** |
| --- | --- | --- | --- | --- | --- | --- | --- | --- |
| **PPP**  **n= 2137** | rs | 0.1694 | 0.2048 | 0.2137 | 0.0828 | 0.0208 | 0.0066 | 0.0032 |
| *P<0.05 | 0.0000 | 0.0000 | 0.0000 | 0.0001 | 0.3369 | 0.7618 | 0.8812 |
| **Pre-pico**  **n= 1286** | rs | 0.1231 | 0.1117 | 0.0633 | 0.0738 | -0.0273 | 0.0069 | -0.1460 |
| *P<0.05 | 0.0000 | 0.0001 | 0.0232 | 0.0082 | 0.3282 | 0.8053 | 0.0000 |
| **Post pico**  **n= 737** | rs | 0.1266 | 0.1730 | 0.3764 | -0.0179 | 0.1309 | 0.0780 | -0.1647 |
| *P<0.05 | 0.0006 | 0.0000 | 0.0000 | 0.6270 | 0.0004 | 0.0344 | 0.0000 |

**Table S6.** Spearman correlation at the PNDL station for the *Pinus* sp.

| **Pinus sp.** |  | **Max Temp** | **Mean Temp** | **Min Temp** | **Wind Speed** | **Relative Humidity** | **Radiation** | **Precipitation** |
| --- | --- | --- | --- | --- | --- | --- | --- | --- |
| **PPP**  **n= 599** | rs | 0.2095 | 0.2623 | 0.3619 | 0.1276 | 0.2222 | 0.1734 | -0.0249 |
| *P<0.05 | 0.0000 | 0.0000 | 0.0000 | 0.0018 | 0.0000 | 0.0000 | 0.5452 |
| **Pre-pico**  **n= 273** | rs | 0.1999 | 0.2725 | 0.3942 | 0.1416 | 0.2914 | 0.3746 | -0.1063 |
| *P<0.05 | 0.0010 | 0.0000 | 0.0000 | 0.0196 | 0.0000 | 0.0000 | 0.0807 |
| **Post pico**  **n= 318** | rs | 0.2279 | 0.1564 | 0.2659 | 0.0050 | 0.1762 | 0.0928 | -0.0233 |
| *P<0.05 | 0.0000 | 0.0054 | 0.0000 | 0.9293 | 0.0018 | 0.0991 | 0.6801 |

**Table S7.** Spearman correlation at the Coyoacán station for the *Quercus* sp.

| **Quercus *sp.*** |  | **Max Temp** | **Mean Temp** | **Min Temp** | **Wind Speed** | **Relative Humidity** | **Radiation** | **Precipitation** |
| --- | --- | --- | --- | --- | --- | --- | --- | --- |
| **PPP**  **n= 1036** | rs | 0.1157 | 0.0912 | 0.0456 | -0.0480 | 0.0404 | -0.0334 | -0.0747 |
| *P<0.05 | 0.0002 | 0.0034 | 0.1428 | 0.1229 | 0.1940 | 0.2825 | 0.0163 |
| **Pre-pico**  **n= 381** | rs | 0.1499 | 0.0651 | -0.0754 | 0.0716 | -0.1461 | -0.0427 | 0.0218 |
| *P<0.05 | 0.0035 | 0.2047 | 0.1414 | 0.1626 | 0.0044 | 0.4724 | 0.6716 |
| **Post pico**  **n= 639** | rs | 0.0836 | 0.0981 | 0.1137 | -0.1281 | 0.1428 | 0.0124 | -0.1042 |
| *P<0.05 | 0.0348 | 0.0133 | 0.0041 | 0.0012 | 0.0003 | 0.7844 | 0.0085 |

**Table S8.** Spearman correlation at the Cuajimalpa station for the *Quercus* sp.

| **Quercus sp.** |  | **Max Temp** | **Mean Temp** | **Min Temp** | **Wind Speed** | **Relative Humidity** | **Radiation** | **Precipitation** |
| --- | --- | --- | --- | --- | --- | --- | --- | --- |
| **PPP**  **n= 1012** | rs | 0.0492 | 0.1388 | 0.1516 | 0.0560 | -0.0420 | -0.0215 | -0.1616 |
| *P<0.05 | 0.1175 | 0.0000 | 0.0000 | 0.0748 | 0.1819 | 0.4951 | 0.0000 |
| **Pre-pico**  **n= 458** | rs | 0.0647 | 0.1520 | 0.1459 | 0.0471 | -0.0461 | -0.0226 | 0.0101 |
| *P<0.05 | 0.1664 | 0.0012 | 0.0018 | 0.3138 | 0.3251 | 0.6287 | 0.8281 |
| **Post pico**  **n= 542** | rs | 0.0283 | 0.1096 | 0.1407 | 0.0662 | -0.0365 | 0.0027 | -0.3013 |
| *P<0.05 | 0.5107 | 0.0108 | 0.0011 | 0.1235 | 0.3959 | 0.9506 | 0.0000 |

**Table S9.** Spearman correlation at the PNDL station for the *Quercus* sp.

| **Quercus sp.** |  | **Max Temp** | **Mean Temp** | **Min Temp** | **Wind Speed** | **Relative Humidity** | **Radiation** | **Precipitation** |
| --- | --- | --- | --- | --- | --- | --- | --- | --- |
| **PPP**  **n= 324** | rs | 0.2358 | 0.3255 | 0.3083 | 0.2604 | 0.0627 | 0.2081 | -0.1573 |
| *P<0.05 | 0.0000 | 0.0000 | 0.0000 | 0.0000 | 0.2613 | 0.0002 | 0.0051 |
| **Pre-pico**  **n= 175** | rs | 0.0941 | 0.2827 | 0.4971 | -0.0871 | 0.5359 | -0.0134 | -0.2691 |
| *P<0.05 | 0.2145 | 0.0002 | 0.0000 | 0.2505 | 0.0000 | 0.8601 | 0.0004 |
| **Post pico**  **n= 145** | rs | 0.2618 | 0.2815 | 0.0118 | 0.4144 | -0.3987 | 0.5363 | -0.1467 |
| *P<0.05 | 0.0017 | 0.0007 | 0.8873 | 0.0000 | 0.0000 | 0.0000 | 0.0816 |
